# Supplementary material for: The (Bio)chemical Base of Flower Colour in Bidens ferulifolia
Source: MDPI journal article supplement (doi:10.3390/plants11101289), 2022-05-11
Supplement: s1 [file s1]

**Supplementary Table S1.** Content of anthochlors and flavonoids, quantified as aglycones after acidic hydrolysis, in *B. ferulifolia* cultivars. Subtotals for anthochlors and each flavonoid class are shown. The column 'Total' includes anthochlors, flavones, anthocyanins and dihydroflavonols. All measurements are given in µg/g fresh weight. Same letters (a-l) indicate no statistically significant differences according to Duncan (p<0.05) between different varieties, n.d.: not detected.

| Cv/Line          | Petal part | Colour         |           | Anthochlors           |                      |                     |                       | Flavones          |                    |                    | Anthocyanins      |                   |                   | Dihydroflavonols  |                   |      |
|------------------|------------|----------------|-----------|-----------------------|----------------------|---------------------|-----------------------|-------------------|--------------------|--------------------|-------------------|-------------------|-------------------|-------------------|-------------------|------|
|                  |            |                |           | Butein                | Okanin               | Maritimetin         | Σ                     | Apigenin          | Luteolin           | Σ                  | Cyanidin          | Peonidin          | Σ                 | DHK               | DHQ               | Σ    |
| 9157             | entirety   | Purple         | µg/g<br>σ | n.d. <sup>h</sup>     | n.d. <sup>j</sup>    | n.d. <sup>i</sup>   | n.d. <sup>l</sup>     | 266 <sup>b</sup>  | 2617 <sup>a</sup>  | 2944 <sup>b</sup>  | 345 <sup>d</sup>  | n.d. <sup>b</sup> | 345 <sup>d</sup>  | 31 <sup>a</sup>   | 1222 <sup>a</sup> | 1261 |
| Firewheel        | base       | Red            | µg/g<br>σ | 248 <sup>cdefg</sup>  | 5921 <sup>def</sup>  | 15 <sup>fgh</sup>   | 6184 <sup>efgh</sup>  | n.d. <sup>c</sup> | 787 <sup>ef</sup>  | 787 <sup>fg</sup>  | 246 <sup>e</sup>  | 3 <sup>a</sup>    | 249 <sup>e</sup>  | n.d. <sup>b</sup> | 148 <sup>e</sup>  | 148  |
|                  |            |                | σ         | 17                    | 551                  | 7                   | 539                   |                   | 30                 | 30                 | 14                | 1                 | 15                |                   | 5                 | 5    |
|                  |            |                | µg/g<br>σ | 227 <sup>cdefgh</sup> | 5026 <sup>efg</sup>  | 19 <sup>efgh</sup>  | 5272 <sup>ghi</sup>   | n.d. <sup>c</sup> | 1090 <sup>d</sup>  | 1090 <sup>e</sup>  | 1806 <sup>a</sup> | n.d. <sup>b</sup> | 1806 <sup>a</sup> | n.d. <sup>b</sup> | 480 <sup>b</sup>  | 480  |
| Painted Red      | tip        | Red            | µg/g<br>σ | 34                    | 268                  | 4                   | 231                   |                   | 148                | 148                | 105               |                   | 105               |                   | 77                | 77   |
|                  |            |                | µg/g<br>σ | 204 <sup>defgh</sup>  | 9019 <sup>abc</sup>  | n.d. <sup>i</sup>   | 9223 <sup>abcd</sup>  | n.d. <sup>c</sup> | 594 <sup>ghi</sup> | 594 <sup>hi</sup>  | 19 <sup>f</sup>   | n.d. <sup>b</sup> | 19 <sup>f</sup>   | n.d. <sup>b</sup> | n.d. <sup>f</sup> | n.d. |
|                  |            |                | σ         | 11                    | 293                  |                     | 304                   |                   | 41                 | 41                 | 5                 |                   | 5                 |                   |                   |      |
| Bidens gelb      | base       | Red-<br>Yellow | µg/g<br>σ | 222 <sup>cdefgh</sup> | 8087 <sup>abcd</sup> | 24 <sup>efgh</sup>  | 8334 <sup>bcde</sup>  | n.d. <sup>c</sup> | 559 <sup>hi</sup>  | 559 <sup>hi</sup>  | 1597 <sup>b</sup> | n.d. <sup>b</sup> | 1597 <sup>b</sup> | n.d. <sup>b</sup> | n.d. <sup>f</sup> | n.d. |
|                  |            |                | σ         | 69                    | 595                  | 3                   | 531                   |                   | 121                | 121                | 71                |                   | 71                |                   |                   |      |
|                  |            |                | µg/g<br>σ | 191 <sup>defgh</sup>  | 1787 <sup>ij</sup>   | 9 <sup>hi</sup>     | 1987 <sup>kl</sup>    | n.d. <sup>c</sup> | 152 <sup>l</sup>   | 152 <sup>lm</sup>  | n.d. <sup>f</sup> | n.d. <sup>b</sup> | n.d. <sup>f</sup> | n.d. <sup>b</sup> | n.d. <sup>f</sup> | n.d. |
| 3176             | entirety   | Yellow         | µg/g<br>σ | 19                    | 24                   | 4                   | 26                    |                   | 21                 | 21                 |                   |                   |                   |                   |                   |      |
|                  |            |                | µg/g<br>σ | 187 <sup>defgh</sup>  | 3359 <sup>ghi</sup>  | 10 <sup>ghi</sup>   | 3556 <sup>ijk</sup>   | n.d. <sup>c</sup> | 338 <sup>jk</sup>  | 338 <sup>jk</sup>  | n.d. <sup>f</sup> | n.d. <sup>b</sup> | n.d. <sup>f</sup> | n.d. <sup>b</sup> | n.d. <sup>f</sup> | n.d. |
|                  |            |                | σ         | 46                    | 273                  | 5                   | 259                   |                   | 18                 | 18                 |                   |                   |                   |                   |                   |      |
| 3277 (Star type) | tip        | Red            | µg/g<br>σ | 791 <sup>a</sup>      | 10249 <sup>a</sup>   | 56 <sup>bc</sup>    | 11095 <sup>a</sup>    | n.d. <sup>c</sup> | 1287 <sup>c</sup>  | 1287 <sup>d</sup>  | n.d. <sup>f</sup> | n.d. <sup>b</sup> | n.d. <sup>f</sup> | n.d. <sup>b</sup> | n.d. <sup>f</sup> | n.d. |
|                  |            |                | σ         | 56                    | 271                  | 17                  | 200                   |                   | 157                | 157                |                   |                   |                   |                   |                   |      |
|                  |            |                | µg/g<br>σ | 197 <sup>efgh</sup>   | 6046 <sup>ij</sup>   | 26 <sup>defgh</sup> | 6269 <sup>efgh</sup>  | n.d. <sup>c</sup> | 193 <sup>kl</sup>  | 193 <sup>kl</sup>  | n.d. <sup>f</sup> | n.d. <sup>b</sup> | n.d. <sup>f</sup> | n.d. <sup>b</sup> | n.d. <sup>f</sup> | n.d. |
| Blazing Embers   | edge       | Yellow         | µg/g<br>σ | 51                    | 590                  | 12                  | 625                   |                   | 9                  | 12                 |                   |                   |                   |                   |                   |      |
|                  |            |                | σ         | 636 <sup>cd</sup>     | 7652 <sup>ab</sup>   | 27 <sup>defg</sup>  | 8315 <sup>bcde</sup>  | n.d. <sup>c</sup> | 794 <sup>ef</sup>  | 794 <sup>fg</sup>  | n.d. <sup>f</sup> | n.d. <sup>b</sup> | n.d. <sup>f</sup> | n.d. <sup>b</sup> | n.d. <sup>f</sup> | n.d. |
|                  |            |                | µg/g<br>σ | 37                    | 102                  | 5                   | 134                   |                   | 157                | 126                |                   |                   |                   |                   |                   |      |
| Painted Yellow   | base       | Yellow         | µg/g<br>σ | 113 <sup>efgh</sup>   | 7013 <sup>cde</sup>  | 76 <sup>a</sup>     | 7202 <sup>cdefg</sup> | n.d. <sup>c</sup> | 685 <sup>fgh</sup> | 685 <sup>gh</sup>  | n.d. <sup>f</sup> | n.d. <sup>b</sup> | n.d. <sup>f</sup> | n.d. <sup>b</sup> | n.d. <sup>f</sup> | n.d. |
|                  |            |                | σ         | 26                    | 1644                 | 27                  | 1646                  |                   | 27                 | 289                |                   |                   |                   |                   |                   |      |
|                  |            |                | µg/g<br>σ | 64 <sup>gh</sup>      | 3129 <sup>ghi</sup>  | 60 <sup>b</sup>     | 3253 <sup>ijk</sup>   | n.d. <sup>c</sup> | 176 <sup>kl</sup>  | 176 <sup>klm</sup> | n.d. <sup>f</sup> | n.d. <sup>b</sup> | n.d. <sup>f</sup> | n.d. <sup>b</sup> | n.d. <sup>f</sup> | n.d. |
| Painted Yellow   | tip        | Red            | µg/g<br>σ | 9                     | 94                   | 8                   | 97                    |                   | 19                 | 297                |                   |                   |                   |                   |                   |      |
|                  |            |                | µg/g<br>σ | 27 <sup>gh</sup>      | 1945 <sup>i</sup>    | 42 <sup>ghi</sup>   | 2015 <sup>kl</sup>    | n.d. <sup>c</sup> | n.d. <sup>l</sup>  | n.d. <sup>m</sup>  | 517 <sup>c</sup>  | n.d. <sup>b</sup> | 517 <sup>c</sup>  | n.d. <sup>b</sup> | 150 <sup>e</sup>  | 150  |
|                  |            |                | σ         | 9                     | 68                   | 12                  | 66                    |                   |                    |                    | 36                |                   | 36                |                   | 34                | 34   |
| Painted Yellow   | tip        | Yellow         | µg/g<br>σ | 58 <sup>fgh</sup>     | 1503 <sup>ij</sup>   | 16 <sup>efgh</sup>  | 1577 <sup>kl</sup>    | n.d. <sup>c</sup> | n.d. <sup>l</sup>  | n.d. <sup>m</sup>  | 250 <sup>e</sup>  | n.d. <sup>b</sup> | 250 <sup>e</sup>  | n.d. <sup>b</sup> | n.d. <sup>f</sup> | n.d. |
|                  |            |                | σ         | 39                    | 218                  | 7                   | 257                   |                   |                    |                    | 16                |                   | 16                |                   |                   |      |

Table is continued on next page.

| Cv/Line                | Petal part | Colour |           | Anthochlors           |                      |                     |                        | Flavones          |                    |                   | Anthocyanins      |                   |                   | Dihydroflavonols  |                   |      |
|------------------------|------------|--------|-----------|-----------------------|----------------------|---------------------|------------------------|-------------------|--------------------|-------------------|-------------------|-------------------|-------------------|-------------------|-------------------|------|
|                        |            |        |           | Butein                | Okanin               | Maritimetin         | Σ                      | Apigenin          | Luteolin           | Σ                 | Cyanidin          | Peonidin          | Σ                 | DHK               | DHQ               | Σ    |
| Giant                  | base       | Yellow | μg/g<br>σ | 253 <sup>cdefg</sup>  | 7844 <sup>abcd</sup> | 13 <sup>gh</sup>    | 8110 <sup>bcdef</sup>  | n.d. <sup>c</sup> | 533 <sup>hi</sup>  | 533 <sup>hi</sup> | 5 <sup>f</sup>    | n.d. <sup>b</sup> | 5 <sup>f</sup>    | n.d. <sup>b</sup> | n.d. <sup>f</sup> | n.d. |
|                        |            |        |           | 62                    | 982                  | 6                   | 1045                   |                   | 88                 | 88                | 3                 |                   | 3                 |                   |                   |      |
|                        | tip        | Yellow | μg/g<br>σ | 133 <sup>cdefgh</sup> | 1440 <sup>ij</sup>   | 20 <sup>efgh</sup>  | 1593 <sup>kl</sup>     | n.d. <sup>c</sup> | 39 <sup>l</sup>    | 39 <sup>lm</sup>  | 28 <sup>f</sup>   | n.d. <sup>b</sup> | 28 <sup>f</sup>   | n.d. <sup>b</sup> | n.d. <sup>f</sup> | n.d. |
|                        |            |        |           | 28                    | 117                  | 10                  | 139                    |                   | 7                  | 7                 | 6                 |                   | 6                 |                   |                   |      |
| Mega Charm             | base       | Yellow | μg/g<br>σ | 229 <sup>cdefg</sup>  | 6585 <sup>cdef</sup> | 15 <sup>ghi</sup>   | 6829 <sup>cdefgh</sup> | n.d. <sup>c</sup> | 764 <sup>efg</sup> | 764 <sup>fg</sup> | n.d. <sup>f</sup> | n.d. <sup>b</sup> | n.d. <sup>f</sup> | n.d. <sup>b</sup> | n.d. <sup>f</sup> | n.d. |
|                        |            |        |           | 30                    | 136                  | 6                   | 120                    |                   | 69                 | 69                |                   |                   |                   |                   |                   |      |
|                        | tip        | Yellow | μg/g<br>σ | 129 <sup>cdefgh</sup> | 1874 <sup>ij</sup>   | n.d. <sup>i</sup>   | 2003 <sup>kl</sup>     | n.d. <sup>c</sup> | 170 <sup>kl</sup>  | 170 <sup>lm</sup> | n.d. <sup>f</sup> | n.d. <sup>b</sup> | n.d. <sup>f</sup> | n.d. <sup>b</sup> | n.d. <sup>f</sup> | n.d. |
|                        |            |        |           | 9                     | 215                  | n.d.                | 215                    |                   | 14                 | 14                |                   |                   |                   |                   |                   |      |
| Eldoro Red Nails       | base       | Yellow | μg/g<br>σ | 79 <sup>gh</sup>      | 4421 <sup>efgh</sup> | 14 <sup>ghi</sup>   | 4514 <sup>hij</sup>    | n.d. <sup>c</sup> | 458 <sup>ij</sup>  | 458 <sup>ij</sup> | n.d. <sup>f</sup> | n.d. <sup>b</sup> | n.d. <sup>f</sup> | n.d. <sup>b</sup> | n.d. <sup>f</sup> | n.d. |
|                        |            |        |           | 20                    | 158                  | 9                   | 149                    |                   | 99                 | 99                |                   |                   |                   |                   |                   |      |
|                        | tip        | Red    | μg/g<br>σ | 211 <sup>cdefgh</sup> | 4554 <sup>efgh</sup> | 23 <sup>efgh</sup>  | 4788 <sup>ghij</sup>   | n.d. <sup>c</sup> | 421 <sup>ij</sup>  | 421 <sup>ij</sup> | 1627 <sup>b</sup> | n.d. <sup>b</sup> | 1627 <sup>b</sup> | n.d. <sup>b</sup> | 323 <sup>c</sup>  | 323  |
|                        |            |        |           | 68                    | 684                  | 11                  | 628                    |                   | 64                 | 64                | 141               |                   | 141               |                   | 49                | 49   |
| Eldoro Yellow Red Star | star       | Red    | μg/g<br>σ | 358 <sup>cd</sup>     | 9625 <sup>ab</sup>   | 17 <sup>ighi</sup>  | 10000 <sup>ab</sup>    | n.d. <sup>c</sup> | 583 <sup>hi</sup>  | 583 <sup>hi</sup> | 353 <sup>d</sup>  | n.d. <sup>b</sup> | 353 <sup>d</sup>  | n.d. <sup>b</sup> | n.d. <sup>f</sup> | n.d. |
|                        |            |        |           | 93                    | 380                  | 5                   | 365                    |                   | 43                 | 43                | 30                |                   | 30                |                   |                   |      |
|                        | edge       | Yellow | μg/g<br>σ | 110 <sup>efgh</sup>   | 1414 <sup>ij</sup>   | 20 <sup>efgh</sup>  | 1545 <sup>kl</sup>     | n.d. <sup>c</sup> | 46 <sup>l</sup>    | 46 <sup>lm</sup>  | n.d. <sup>f</sup> | n.d. <sup>b</sup> | n.d. <sup>f</sup> | n.d. <sup>b</sup> | n.d. <sup>f</sup> | n.d. |
|                        |            |        |           | 36                    | 88                   | 7                   | 61                     |                   | 13                 | 13                |                   |                   |                   |                   |                   |      |
| Taka Tuka              | base       | Yellow | μg/g<br>σ | 340 <sup>cde</sup>    | 9112 <sup>abc</sup>  | 61 <sup>ab</sup>    | 9513 <sup>abc</sup>    | n.d. <sup>c</sup> | 901 <sup>e</sup>   | 901 <sup>f</sup>  | n.d. <sup>f</sup> | n.d. <sup>b</sup> | n.d. <sup>f</sup> | n.d. <sup>b</sup> | n.d. <sup>f</sup> | n.d. |
|                        |            |        |           | 34                    | 504                  | 2                   | 540                    |                   | 715                | 715               |                   |                   |                   |                   |                   |      |
|                        | tip        | Cream  | μg/g<br>σ | 277 <sup>cdef</sup>   | 2233 <sup>hij</sup>  | 33 <sup>def</sup>   | 2543 <sup>kl</sup>     | n.d. <sup>c</sup> | 112 <sup>l</sup>   | 112 <sup>lm</sup> | n.d. <sup>f</sup> | n.d. <sup>b</sup> | n.d. <sup>f</sup> | n.d. <sup>b</sup> | n.d. <sup>f</sup> | n.d. |
|                        |            |        |           | 29                    | 298                  | 35                  | 362                    |                   | 105                | 105               |                   |                   |                   |                   |                   |      |
| 3267                   | base       | Yellow | μg/g<br>σ | 441 <sup>bc</sup>     | 8815 <sup>abc</sup>  | 35 <sup>de</sup>    | 9291 <sup>abcd</sup>   | n.d. <sup>c</sup> | 1371 <sup>bc</sup> | 1371 <sup>d</sup> | n.d. <sup>f</sup> | n.d. <sup>b</sup> | n.d. <sup>f</sup> | n.d. <sup>b</sup> | n.d. <sup>f</sup> | n.d. |
|                        |            |        |           | 491                   | 5385                 | 9                   | 5885                   |                   | 102                | 102               |                   |                   |                   |                   |                   |      |
|                        | tip        | Cream  | μg/g<br>σ | 754 <sup>a</sup>      | 4855 <sup>efg</sup>  | 18 <sup>efghi</sup> | 5627 <sup>ighi</sup>   | n.d. <sup>c</sup> | 416 <sup>ij</sup>  | 416 <sup>ij</sup> | n.d. <sup>f</sup> | n.d. <sup>b</sup> | n.d. <sup>f</sup> | n.d. <sup>b</sup> | n.d. <sup>f</sup> | n.d. |
|                        |            |        |           | 52                    | 288                  | 15                  | 355                    |                   | 45                 | 45                |                   |                   |                   |                   |                   |      |
| Beedance White         | entirety   | White  | μg/g<br>σ | n.d. <sup>h</sup>     | n.d. <sup>j</sup>    | n.d. <sup>i</sup>   | n.d. <sup>l</sup>      | 439 <sup>a</sup>  | 2754 <sup>a</sup>  | 3252 <sup>a</sup> | 7 <sup>i</sup>    | n.d. <sup>b</sup> | 7 <sup>i</sup>    | n.d. <sup>b</sup> | 221 <sup>d</sup>  | 221  |
|                        |            |        |           |                       |                      |                     |                        | 59                | 306                | 249               | 4                 |                   | 4                 |                   | 23                | 23   |
| 9163                   | entirety   | White  | μg/g<br>σ | n.d. <sup>h</sup>     | n.d. <sup>j</sup>    | n.d. <sup>i</sup>   | n.d. <sup>l</sup>      | 285 <sup>b</sup>  | 1498 <sup>b</sup>  | 1806 <sup>c</sup> | n.d. <sup>f</sup> | n.d. <sup>b</sup> | n.d. <sup>f</sup> | n.d. <sup>b</sup> | 47 <sup>i</sup>   | 47   |
|                        |            |        |           |                       |                      |                     |                        | 23                | 197                | 174               |                   |                   |                   |                   | 8                 | 8    |

**Supplementary Table S2.** Selected enzyme activities of the flavonoid and anthochlor pathways detected from enzyme preparations of *B. ferulifolia* cultivars. Same letters (a-i) indicate no statistical significant differences according to Duncan ( $p < 0.05$ ) between different varieties, n.d.: not detected.

| Cv/Line                                                   | Petal section | Colour     | CHS                        | FHT                    | DFR                     | FNSII                    | CH3H                     | CH3'H                         |
|-----------------------------------------------------------|---------------|------------|----------------------------|------------------------|-------------------------|--------------------------|--------------------------|-------------------------------|
| Specific activity [nmols <sup>-1</sup> kg <sup>-1</sup> ] |               |            |                            |                        |                         |                          |                          |                               |
| 9157                                                      | entirety      | Purple     | 852 <sup>bcd</sup> ± 164   | 321 <sup>b</sup> ± 84  | 1286 <sup>a</sup> ± 226 | 183 <sup>de</sup> ± 17   | 2121 <sup>a</sup> ± 314  | 1642 <sup>ghi</sup> ± 478     |
| Firewheel                                                 | base          | Red        | 383 <sup>ghi</sup> ± 62    | 90 <sup>ef</sup> ± 9   | 473 <sup>cd</sup> ± 39  | 417 <sup>ab</sup> ± 62   | 3663 <sup>a</sup> ± 827  | 7472 <sup>a</sup> ± 1511      |
|                                                           | tip           | Red        | 253 <sup>i</sup> ± 26      | 145 <sup>de</sup> ± 9  | 892 <sup>b</sup> ± 82   | 469 <sup>a</sup> ± 90    | 4463 <sup>a</sup> ± 1626 | 3367 <sup>defgh</sup> ± 313   |
| Painted Red                                               | base          | Red-Yellow | 774 <sup>cde</sup> ± 142   | n.d. <sup>g</sup>      | 605 <sup>c</sup> ± 68   | 435 <sup>a</sup> ± 194   | 3568 <sup>a</sup> ± 3568 | 4701 <sup>bcd</sup> ± 4701    |
|                                                           | tip           | Red        | 658 <sup>cdefg</sup> ± 23  | 546 <sup>a</sup> ± 85  | 975 <sup>b</sup> ± 176  | 391 <sup>abc</sup> ± 42  | 3704 <sup>a</sup> ± 198  | 5989 <sup>ab</sup> ± 661      |
| Bidens gelb                                               | entirety      | Yellow     | 465 <sup>fghi</sup> ± 146  | 69 <sup>fg</sup> ± 12  | n.d. <sup>h</sup>       | 162 <sup>de</sup> ± 40   | 2988 <sup>a</sup> ± 1304 | 3414 <sup>defgh</sup> ± 971   |
| 3176                                                      | base          | Yellow     | 219 <sup>i</sup> ± 74      | 219 <sup>c</sup> ± 35  | 11 <sup>h</sup> ± 14    | 400 <sup>abc</sup> ± 267 | 3519 <sup>a</sup> ± 2919 | 4000 <sup>cdef</sup> ± 872    |
|                                                           | tip           | Red        | 250 <sup>i</sup> ± 11      | 249 <sup>c</sup> ± 18  | 188 <sup>g</sup> ± 49   | 418 <sup>ab</sup> ± 101  | 5589 <sup>a</sup> ± 3125 | 3980 <sup>cdef</sup> ± 138    |
| 3277                                                      | edge          | Yellow     | 489 <sup>efghi</sup> ± 63  | n.d. <sup>g</sup>      | 55 <sup>gh</sup> ± 44   | 383 <sup>abc</sup> ± 175 | 4386 <sup>a</sup> ± 4386 | 4762 <sup>bcd</sup> ± 4762    |
|                                                           | star          | Red        | 734 <sup>cdef</sup> ± 273  | 381 <sup>b</sup> ± 77  | 240 <sup>ef</sup> ± 87  | 315 <sup>abcd</sup> ± 94 | 3781 <sup>a</sup> ± 711  | 5619 <sup>bc</sup> ± 1569     |
| Blazing Embers                                            | base          | Yellow     | 226 <sup>i</sup> ± 70      | n.d. <sup>g</sup>      | 20 <sup>g</sup> ± 19    | 118 <sup>de</sup> ± 33   | 2310 <sup>a</sup> ± 1076 | 3159 <sup>defghi</sup> ± 3159 |
|                                                           | tip           | Red        | 276 <sup>hi</sup> ± 67     | 242 <sup>c</sup> ± 31  | 153 <sup>fgh</sup> ± 30 | 179 <sup>de</sup> ± 25   | 1996 <sup>a</sup> ± 555  | 2184 <sup>fghi</sup> ± 346    |
| Painted Yellow                                            | base          | Red        | 446 <sup>fghi</sup> ± 126  | 180 <sup>cd</sup> ± 38 | 377 <sup>de</sup> ± 41  | 231 <sup>bcd</sup> ± 24  | 2619 <sup>a</sup> ± 913  | 2454 <sup>efghi</sup> ± 702   |
|                                                           | tip           | Yellow     | 483 <sup>cde</sup> ± 179   | n.d. <sup>g</sup>      | 18 <sup>h</sup> ± 23    | 131 <sup>de</sup> ± 14   | 2870 <sup>a</sup> ± 1395 | 3101 <sup>cdef</sup> ± 3101   |
| Giant                                                     | base          | Yellow     | 480 <sup>fghi</sup> ± 63   | n.d. <sup>g</sup>      | 255 <sup>ef</sup> ± 85  | 172 <sup>de</sup> ± 44   | 3640 <sup>a</sup> ± 3019 | 3958 <sup>cdef</sup> ± 3958   |
|                                                           | tip           | Yellow     | 403 <sup>ghi</sup> ± 25    | n.d. <sup>g</sup>      | 559 <sup>c</sup> ± 70   | 104 <sup>e</sup> ± 9     | 1769 <sup>a</sup> ± 268  | 3505 <sup>defgh</sup> ± 3505  |
| Mega Charm                                                | base          | Yellow     | 430 <sup>ghi</sup> ± 160   | n.d. <sup>g</sup>      | n.d. <sup>h</sup>       | 46 <sup>e</sup> ± 9      | 2795 <sup>a</sup> ± 2745 | 4135 <sup>cde</sup> ± 4135    |
|                                                           | tip           | Yellow     | 217 <sup>i</sup> ± 54      | n.d. <sup>g</sup>      | n.d. <sup>h</sup>       | 70 <sup>e</sup> ± 15     | 1730 <sup>a</sup> ± 1370 | 1366 <sup>i</sup> ± 1366      |
| Eloro. Red Nails                                          | base          | Yellow     | 412 <sup>ghi</sup> ± 79    | n.d. <sup>g</sup>      | n.d. <sup>h</sup>       | 218 <sup>cde</sup> ± 68  | 3880 <sup>a</sup> ± 955  | 3126 <sup>defghi</sup> ± 3126 |
|                                                           | tip           | Red        | 436 <sup>ghi</sup> ± 78    | 375 <sup>b</sup> ± 26  | 1028 <sup>b</sup> ± 74  | 221 <sup>cde</sup> ± 35  | 3617 <sup>a</sup> ± 327  | 3400 <sup>defgh</sup> ± 321   |
| Eldoro Yellow Red Star                                    | star          | Red        | 561 <sup>efghi</sup> ± 19  | 187 <sup>cd</sup> ± 10 | 435 <sup>d</sup> ± 54   | 184 <sup>de</sup> ± 18   | 2878 <sup>a</sup> ± 711  | 2437 <sup>efghi</sup> ± 433   |
|                                                           | edge          | Yellow     | 490 <sup>defgh</sup> ± 131 | n.d. <sup>g</sup>      | n.d. <sup>h</sup>       | 45 <sup>e</sup> ± 3      | 1363 <sup>a</sup> ± 1091 | 1751 <sup>ghi</sup> ± 211     |
| Taka Tuka                                                 | base          | Yellow     | 827 <sup>bcd</sup> ± 51    | 30 <sup>fg</sup> ± 7   | n.d. <sup>h</sup>       | 137 <sup>de</sup> ± 23   | 2683 <sup>a</sup> ± 1523 | 2736 <sup>efghi</sup> ± 2736  |
|                                                           | tip           | Cream      | 786 <sup>bcd</sup> ± 51    | n.d. <sup>g</sup>      | n.d. <sup>h</sup>       | 60 <sup>e</sup> ± 12     | 1732 <sup>a</sup> ± 1497 | 3376 <sup>defgh</sup> ± 856   |
| 3267                                                      | base          | Yellow     | 1663 <sup>a</sup> ± 54     | 43 <sup>fg</sup> ± 10  | n.d. <sup>h</sup>       | 131 <sup>de</sup> ± 28   | 3371 <sup>a</sup> ± 2808 | 4167 <sup>cde</sup> ± 4167    |
|                                                           | tip           | Cream      | 923 <sup>bcd</sup> ± 85    | n.d. <sup>g</sup>      | n.d. <sup>h</sup>       | 55 <sup>e</sup> ± 14     | 1578 <sup>a</sup> ± 891  | 3347 <sup>defgh</sup> ± 423   |
| Beedance White                                            | entirety      | White      | 1707 <sup>a</sup> ± 361    | 56 <sup>fg</sup> ± 14  | n.d. <sup>h</sup>       | 69 <sup>e</sup> ± 19     | 1609 <sup>a</sup> ± 1126 | 2157 <sup>fghi</sup> ± 2157   |
| 9163                                                      | entirety      | White      | 1064 <sup>b</sup> ± 110    | 101 <sup>ef</sup> ± 14 | n.d. <sup>h</sup>       | 159 <sup>de</sup> ± 28   | 3273 <sup>a</sup> ± 775  | 1543 <sup>hi</sup> ± 1543     |

**Supplementary Table S3.** Mass spectrometric data of substrates and enzymatically derived products after incubation of isoliquiritigenin or butein in the presence of enzyme preparations of *B. ferulifolia* and NADPH.

| Analytes                    | Retention time | $\lambda_{\text{max}}$ (nm) | Theoretical precursor ion [M-H] <sup>-</sup> (m/z) | Measured precursor ion [M-H] <sup>-</sup> (m/z) | $\Delta$ ppm | Fragment ions (m/z) |
|-----------------------------|----------------|-----------------------------|----------------------------------------------------|-------------------------------------------------|--------------|---------------------|
| Isoliquiritigenin           | 11.98          | 239.8; 368.5                | 255.0663                                           | 255.0664                                        | 0.3921       | 119.0501; 135.0085  |
| 3'-Hydroxyisoliquiritigenin | 10.69          | 238.8; 366.3                | 271.0612                                           | 271.0610                                        | -0.7378      | 119.0500; 151.0033  |
| Butein                      | 11.01          | 261.1; 381.3                | 271.0612                                           | 271.0605                                        | -2.5824      | 135.0452; 135.0084  |
| Okanin                      | 9.80           | 259.8; 378.6                | 287.0561                                           | 287.0557                                        | -1.3935      | 135.0450; 151.0036  |

**Supplementary Table S4.** Carotenoid yields (mg/g) in extracts of flowers of cultivars Taka Tuka and Bidens gelb (n = 3, SD). Same letters (a-c) indicate no statistical differences in the same column according to Duncan (p<0.05), n.d.: not detected, Xanthophylls and carotenoid esters are expressed in (all-*E*)-lutein equivalents

| Cv/line     | Petal section | (all- <i>E</i> )-lutein<br>(mg/g) | Total free<br>carotenoids (mg/g) | Total monoesters<br>(mg/g)  | Total diesters<br>(mg/g)   | Total carotenoids<br>(mg/g) |
|-------------|---------------|-----------------------------------|----------------------------------|-----------------------------|----------------------------|-----------------------------|
| Taka Tuka   | base          | 0.37 <sup>b</sup> ± 0.04          | 0.59 <sup>a</sup> ± 0.04         | 0.062 <sup>c</sup> ± 0.0014 | n.d. <sup>c</sup>          | 0.65 <sup>c</sup> ± 0.04    |
|             | tip           | 0.50 <sup>a</sup> ± 0.07          | 0.67 <sup>a</sup> ± 0.08         | 0.032 <sup>c</sup> ± 0.008  | n.d. <sup>c</sup>          | 0.70 <sup>bc</sup> ± 0.09   |
| Bidens gelb | base          | 0.112 <sup>c</sup> ± 0.013        | 0.184 <sup>c</sup> ± 0.021       | 0.54 <sup>b</sup> ± 0.05    | 0.087 <sup>a</sup> ± 0.028 | 0.81 <sup>b</sup> ± 0.08    |
|             | tip           | 0.172 <sup>c</sup> ± 0.004        | 0.335 <sup>b</sup> ± 0.006       | 1.29 <sup>a</sup> ± 0.04    | 0.066 <sup>b</sup> ± 0.011 | 1.69 <sup>a</sup> ± 0.05    |

**Supplementary Table S5.** Identified compounds by UHPLC-DAD-APCI-MS in *B. ferulifolia* cultivars Taka Tuka (T) and Bidens gelb (G). The corresponding chromatograms are shown in Suppl. Figure S3.

| Peak (sample)          | Compound                       | $\lambda_{\max}$ (nm) | [M+H] <sup>+</sup> (m/z) | Fragment ions (m/z)                                                                                                                                                                      |
|------------------------|--------------------------------|-----------------------|--------------------------|------------------------------------------------------------------------------------------------------------------------------------------------------------------------------------------|
| 1 (G)                  | unidentified                   | 416; 439; 468         | -                        | -                                                                                                                                                                                        |
| 2 (G, T)               | (13Z)-violaxanthin             | 416, 440, 468         | 601.4                    | 583.4 [M+H-H <sub>2</sub> O] <sup>+</sup> ; 565.4 [M+H-2H <sub>2</sub> O] <sup>+</sup>                                                                                                   |
| 3 (G, T)               | (all-E)-violaxanthin           | 415, 437, 467         | 601.4                    | 583.4 [M+H-H <sub>2</sub> O] <sup>+</sup> ; 565.4 [M+H-2H <sub>2</sub> O] <sup>+</sup> ; 509.4 [M+H-92] <sup>+</sup> ; 491.4[M+H-H <sub>2</sub> O-92] <sup>+</sup>                       |
| 4a (G, T)              | (all-E)-luteoxanthin           | 399, 422, 448         | 601.4                    | 583.4 [M+H-H <sub>2</sub> O] <sup>+</sup> ; 565.4 [M+H-2H <sub>2</sub> O] <sup>+</sup> ; 509.4 [M+H-92] <sup>+</sup> ; 491.4[M+H-H <sub>2</sub> O-92] <sup>+</sup>                       |
| 4b (G, T)              | (9Z)-violaxanthin              | 415, 440, 469         | 601.4                    | 583.4 [M+H-H <sub>2</sub> O] <sup>+</sup> ; 565.4 [M+H-2H <sub>2</sub> O] <sup>+</sup>                                                                                                   |
| 5 (G, T)               | lutein 5,6-epoxide             | 415, 437, 466         | 585.4                    | 567.4 [M+H-H <sub>2</sub> O] <sup>+</sup> ; 549.4 [M+H-2H <sub>2</sub> O] <sup>+</sup>                                                                                                   |
| 6 (G, T)               | (all-E)-antheraxanthin         | Sh420, 442, 469       | 585.4                    | 567.4 [M+H-H <sub>2</sub> O] <sup>+</sup> ; 549.4 [M+H-2H <sub>2</sub> O] <sup>+</sup>                                                                                                   |
| 7 (T)                  | (9Z)-luteoxanthin              | 397, 420, 446         | 601.4                    | 583.4 [M+H-H <sub>2</sub> O] <sup>+</sup> ; 565.4 [M+H-2H <sub>2</sub> O] <sup>+</sup>                                                                                                   |
| 8 (G)                  | unidentified                   | 416, 438, 467         | -                        | 549.4 [M+H-2H <sub>2</sub> O] <sup>+</sup>                                                                                                                                               |
| 9 (G)                  | (13Z)-lutein                   | 414, 437, 466         | 569.4                    | 551.4 [M+H-H <sub>2</sub> O] <sup>+</sup> ; 533.4 [M+H-2H <sub>2</sub> O] <sup>+</sup> ; 459.4 [M+H-H <sub>2</sub> O-92] <sup>+</sup>                                                    |
| 10 (G, T) <sup>a</sup> | (all-E)-lutein                 | Sh420, 442, 470       | 569.4                    | 551.4 [M+H-H <sub>2</sub> O] <sup>+</sup> ; 533.4 [M+H-2H <sub>2</sub> O] <sup>+</sup> ; 459.4 [M+H-H <sub>2</sub> O-92] <sup>+</sup>                                                    |
| 11 (G, T)              | (all-E)-zeaxanthin             | Sh420, 446, 470       | 569.4                    | 551.4 [M+H-H <sub>2</sub> O] <sup>+</sup> ; 533.4 [M+H-2H <sub>2</sub> O] <sup>+</sup> ; 477.4 [M+H-92] <sup>+</sup> ; 459.4 [M+H-H <sub>2</sub> O-92] <sup>+</sup>                      |
| 12 (T)                 | (9Z)-lutein                    | Sh415, 437, 465       | 569.4                    | 551.4 [M+H-H <sub>2</sub> O] <sup>+</sup> ; 533.4 [M+H-2H <sub>2</sub> O] <sup>+</sup>                                                                                                   |
| 13 (T, G)              | chlorophyll b                  | 465, 650              | -                        | -                                                                                                                                                                                        |
| 14 (T, G)              | chlorophyll a                  | 430, 664              | -                        | -                                                                                                                                                                                        |
| 15 (G)                 | (all-E)-violaxanthin myristate | 417, 439, 468         | 811.6                    | 793.6 [M+H-H <sub>2</sub> O] <sup>+</sup> ; 775.7 [M+H-2H <sub>2</sub> O] <sup>+</sup> ; 701.6 [M+H-H <sub>2</sub> O-92] <sup>+</sup> ; 565.4 [M+H-H <sub>2</sub> O-My] <sup>+</sup>     |
| 16 (G)                 | (9Z)-violaxanthin myristate    | 412, 435, 463         | 811.6                    | 793.6 [M+H-H <sub>2</sub> O] <sup>+</sup> ; 565.4 [M+H-H <sub>2</sub> O-My] <sup>+</sup>                                                                                                 |
| 17a (G)                | violaxanthin palmitate         | 416, 439, 468         | 839.7                    | 821.6 [M+H-H <sub>2</sub> O] <sup>+</sup> ; 803.6 [M+H-2H <sub>2</sub> O] <sup>+</sup> ; 729.6 [M+H-H <sub>2</sub> O-92] <sup>+</sup> ; 565.4 [M+H-H <sub>2</sub> O-Pa] <sup>+</sup>     |
| 17b (G)                | violaxanthin palmitate         | 414, 438, 467         | 839.7                    | 821.6 [M+H-H <sub>2</sub> O] <sup>+</sup> ; 803.6 [M+H-2H <sub>2</sub> O] <sup>+</sup> ; 729.6 [M+H-H <sub>2</sub> O-92] <sup>+</sup> ; 565.4 [M+H-H <sub>2</sub> O-Pa] <sup>+</sup>     |
| 18 (G)                 | (all-E)-luteoxanthin palmitate | Sh401, 420, 446       | 839.7                    | 821.6 [M+H-H <sub>2</sub> O] <sup>+</sup> ; 565.4 [M+H-H <sub>2</sub> O-Pa] <sup>+</sup>                                                                                                 |
| 19 (G)                 | (9Z)-violaxanthin palmitate    | 413, 435, 463         | 839.7                    | 821.6 [M+H-H <sub>2</sub> O] <sup>+</sup> ; 565.4 [M+H-H <sub>2</sub> O-Pa] <sup>+</sup>                                                                                                 |
| 20 (G)                 | lutein 5,6-epoxide palmitate   | 414, 439, 468         | 823.6                    | 805.7 [M+H-H <sub>2</sub> O] <sup>+</sup> ; 549.4 [M+H-H <sub>2</sub> O-Pa] <sup>+</sup>                                                                                                 |
| 21 (G)                 | (13Z)-lutein myristate         | 415, 438, 467         | 779.6                    | 761.6 [M+H-H <sub>2</sub> O] <sup>+</sup> ; 551.4 [M+H-My] <sup>+</sup> ; 533.4 [M+H-My-H <sub>2</sub> O] <sup>+</sup> ; 495.4 [M+H-My-56] <sup>+</sup> ; 459.4 [M+H-My-92] <sup>+</sup> |
| 22 (G, T)              | (all-E)-lutein 3'-O-myristate  | Sh421, 444, 471       | 779.6                    | 551.4 [M+H-My] <sup>+</sup> ; 533.4 [M+H-My-H <sub>2</sub> O] <sup>+</sup> ; 459.4 [M+H-My-92] <sup>+</sup>                                                                              |
| 23 (G, T)              | (all-E)-lutein 3-O-myristate   | Sh420, 443, 470       | 779.6                    | 761.6 [M+H-H <sub>2</sub> O] <sup>+</sup> ; 551.4 [M+H-My] <sup>+</sup> ; 533.4 [M+H-My-H <sub>2</sub> O] <sup>+</sup>                                                                   |
| 24 (T) <sup>a</sup>    | (all-E)- $\beta$ -carotene     | Sh425, 449, 474       | 537.4                    | 536.4 [M] <sup>+</sup> ; 445.4 [M+H-92] <sup>+</sup>                                                                                                                                     |
| 25a (G)                | (all-E)-zeaxanthin myristate   | Sh420, 442, 468       | 779.6                    | 761.6 [M+H-H <sub>2</sub> O] <sup>+</sup> ; 551.4 [M+H-My] <sup>+</sup> ; 533.4 [M+H-My-H <sub>2</sub> O] <sup>+</sup>                                                                   |
| 25b (G)                | unidentified                   | 416, 440, 468         | -                        | -                                                                                                                                                                                        |

Table is continued on next page.

| Peak<br>(sample) | Compound                                        | $\lambda_{\text{max}}$<br>(nm) | [M+H] <sup>+</sup><br>(m/z) | Fragment ions<br>(m/z)                                                                                                                                                |
|------------------|-------------------------------------------------|--------------------------------|-----------------------------|-----------------------------------------------------------------------------------------------------------------------------------------------------------------------|
| 26 (G)           | (13Z)-lutein palmitate                          | 415, 438, 467                  | 807.7                       | 789.7 [M+H-H <sub>2</sub> O] <sup>+</sup> ; 551.4 [M+H-Pa] <sup>+</sup> ; 533.4 [M+H-Pa-H <sub>2</sub> O] <sup>+</sup>                                                |
| 27 (G, T)        | (all- <i>E</i> )-lutein 3'- <i>O</i> -palmitate | Sh421, 444, 471                | 807.7                       | 551.4 [M+H-Pa] <sup>+</sup> ; 533.4 [M+H-Pa-H <sub>2</sub> O] <sup>+</sup>                                                                                            |
| 28 (G, T)        | (all- <i>E</i> )-lutein 3- <i>O</i> -palmitate  | Sh420, 444, 471                | 807.7                       | 789.7 [M+H-H <sub>2</sub> O] <sup>+</sup> ; 697.6 [M+H-H <sub>2</sub> O-92] <sup>+</sup> ; 551.4 [M+H-Pa] <sup>+</sup> ; 533.4 [M+H-Pa-H <sub>2</sub> O] <sup>+</sup> |
| 29 (G, T)        | (all- <i>E</i> ) zeaxanthin palmitate           | Sh423, 449, 475                | 807.7                       | 789.7 [M+H-H <sub>2</sub> O] <sup>+</sup> ; 551.4 [M+H-Pa] <sup>+</sup> ; 533.4 [M+H-Pa-H <sub>2</sub> O] <sup>+</sup>                                                |
| 30 (G)           | (13Z)-lutein stearate                           | 415, 438, 468                  | 835.7                       | 817.7 [M+H-H <sub>2</sub> O] <sup>+</sup> ; 533.4 [M+H-St-H <sub>2</sub> O] <sup>+</sup>                                                                              |
| 31 (G)           | (all- <i>E</i> )-lutein 3'- <i>O</i> -stearate  | 420, 443, 471                  | 835.7                       | 817.7 [M+H-H <sub>2</sub> O] <sup>+</sup> ; 551.4 [M+H-St] <sup>+</sup> ; 533.4 [M+H-St-H <sub>2</sub> O] <sup>+</sup>                                                |
| 32 (G)           | (all- <i>E</i> )-lutein 3- <i>O</i> -stearate   | 421, 443, 472                  | 835.7                       | 817.7 [M+H-H <sub>2</sub> O] <sup>+</sup> ; 551.5 [M+H-St] <sup>+</sup> ; 533.4 [M+H-St-H <sub>2</sub> O] <sup>+</sup>                                                |
| 33 (G)           | violaxanthin myristate palmitate                | 417, 440, 469                  | 1049.9                      | 1031.8 [M+H-H <sub>2</sub> O] <sup>+</sup> ; 939.8 [M+H-92-H <sub>2</sub> O] <sup>+</sup> ; 547.4 [M+H-My-Pa] <sup>+</sup>                                            |
| 34 (G)           | violaxanthin dipalmitate                        | 416, 439, 468                  | 1077.9                      | 1059.9 [M+H-H <sub>2</sub> O] <sup>+</sup> ; 985.8 [M+H-92] <sup>+</sup> ; 803.6 [M+H-Pa-H <sub>2</sub> O] <sup>+</sup> ; 547.4 [M+H-2Pa] <sup>+</sup>                |
| 35 (G)           | (13Z)-lutein dimyristate                        | 416, 439, 468                  | 989.9                       | 761.6 [M+H-My] <sup>+</sup> ; 533.4 [M+H-2My] <sup>+</sup>                                                                                                            |
| 36 (G)           | (all- <i>E</i> )-lutein dimyristate             | 421, 444, 471                  | -                           | 761.6 [M+H-My] <sup>+</sup> ; 669.6 [M+H-92] <sup>+</sup> ; 533.4 [M+H-2My] <sup>+</sup>                                                                              |
| 37 (G)           | (13Z)-lutein myristate palmitate                | 415, 439, 468                  | -                           | 789.7 [M+H-My] <sup>+</sup> ; 761.6 [M+H-Pa] <sup>+</sup> ; 533.4 [M+H-My-Pa] <sup>+</sup>                                                                            |
| 38 (G)           | (all- <i>E</i> )-lutein myristate palmitate     | 422, 444, 473                  | -                           | 789.7 [M+H-My] <sup>+</sup> ; 761.6 [M+H-Pa] <sup>+</sup> ; 533.4 [M+H-My-Pa] <sup>+</sup>                                                                            |
| 39 (G)           | (13Z)-lutein dipalmitate                        | 416, 439, 467                  | -                           | 789.7 [M+H-Pa] <sup>+</sup> ; 533.4 [M+H-2Pa] <sup>+</sup>                                                                                                            |

<sup>a</sup>compared to standard substances

My: myristate; Pa: palmitate; St: stearate

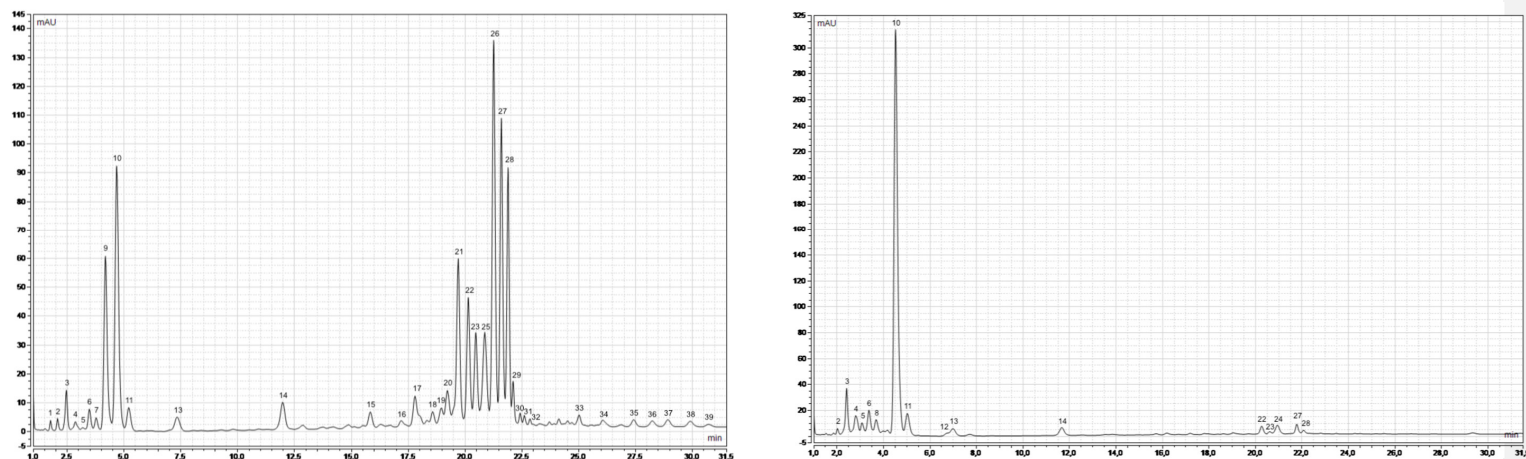

**Supplementary Figure S1.** HPLC chromatograms ( $\lambda = 450$  nm) of the methanolic extracts of petal tips of *B. ferulifolia* cv. Bidens gelb (left) and cv. Taka Tuka (right). Peak numbers are resolved in Suppl. Table S4.



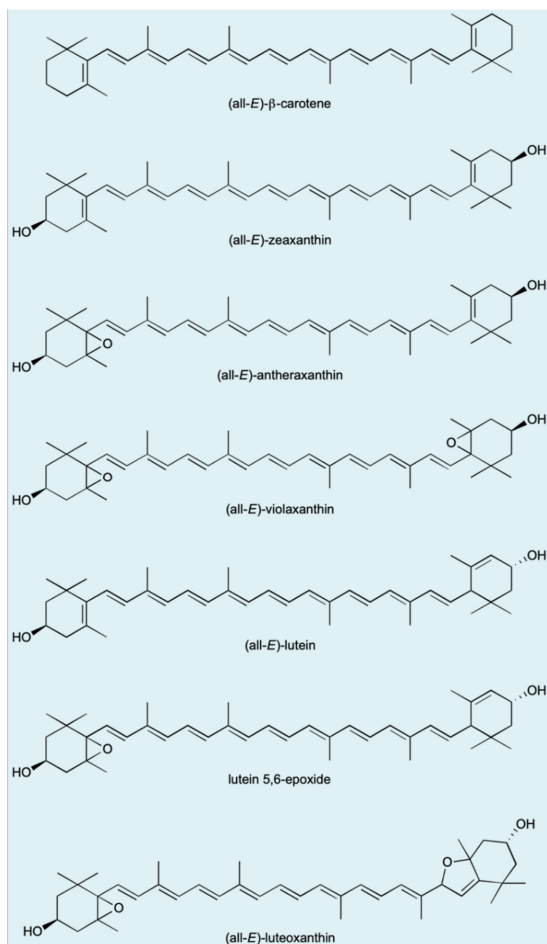

**Supplementary Figure S2.** Chemical structures of carotenoids identified in *B. ferulifolia*.

Commented [HH1]: was replaced

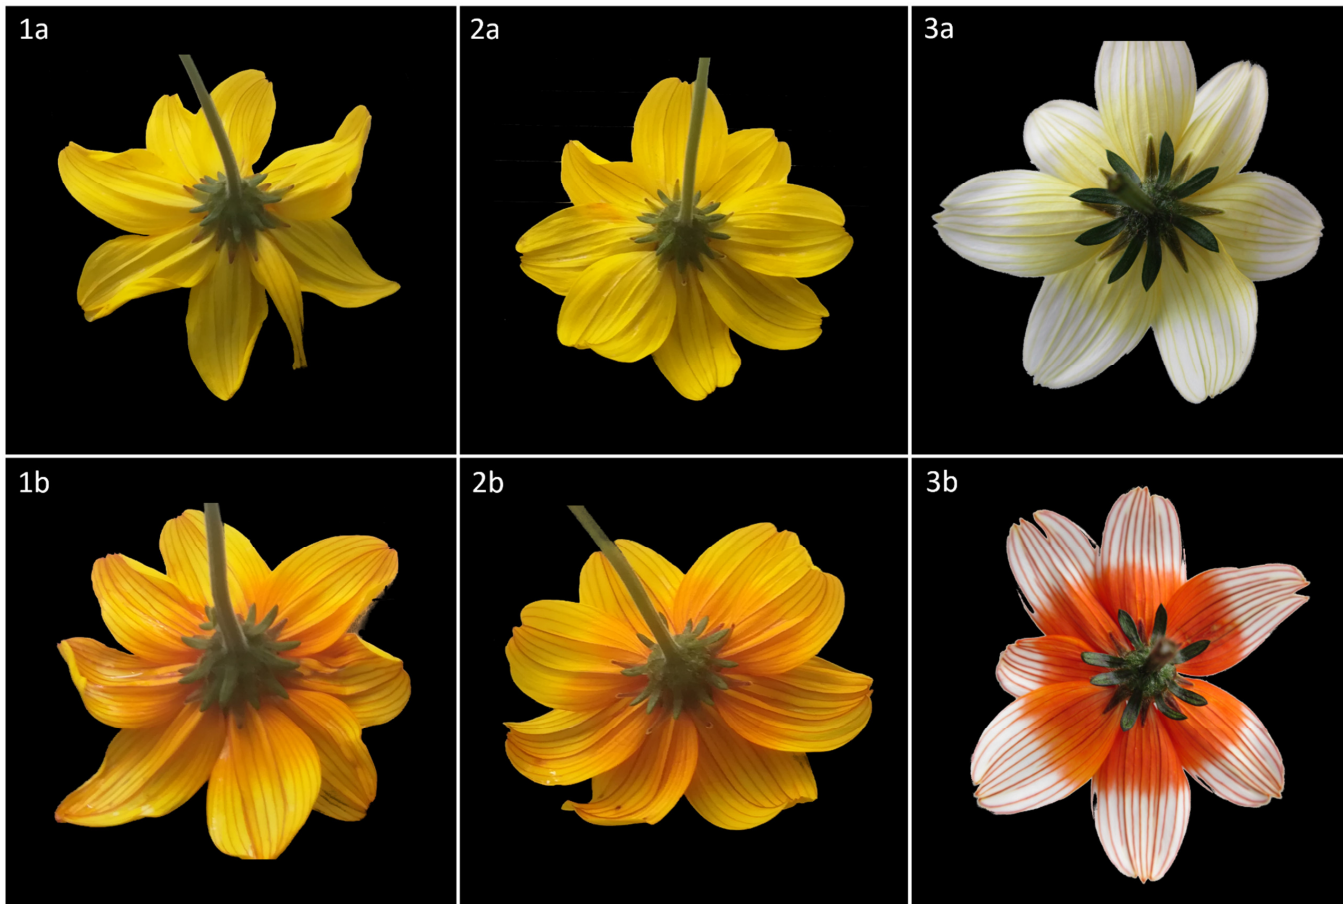

**Supplementary Figure S3.** Photos showing the undersides of cv. Giant Yellow without (1a) and with (1b) alkaline vapor treatment, cv. Mega Charm without (2a) and with (2b) alkaline vapor treatment, and cv. Taka Tuka without (3a) and with (3b) alkaline treatment.
